# Supplementary material
Source: Springer Nature journal article supplement (https://www.springermedizin.de/resource/supplementary/12943_2011_1058_MOESM7_ESM.pdf/9552120)
Supplement: MOESM7 [file 9552120]

**Supplementary Table 1. RPPA antibodies and Spearman correlation p values**

|                     |          |                | <b>EMSAH3</b>    | <b>U2AF65</b>    | <b>p 54nrb</b> | <b>PSF</b>       |
|---------------------|----------|----------------|------------------|------------------|----------------|------------------|
| <b>PKC alpha</b>    | ab32376  | abcam          | <b>1</b>         | <b>1</b>         | <b>0.0466</b>  | <b>0.1131</b>    |
| <b>Ph-Erk</b>       | 4370     | Cell Signaling | <b>0.468</b>     | <b>0.00741</b>   | <b>1</b>       | <b>1</b>         |
| <b>NF-κB p65</b>    | sc-109   | Santa Cruz     | <b>5.46e-06</b>  | <b>1.716e-05</b> | <b>1</b>       | <b>1</b>         |
| <b>Cyclin D1</b>    | 2922     | Cell Signaling | <b>1</b>         | <b>1</b>         | <b>0.00021</b> | <b>8.19e-05</b>  |
| <b>Ph Akt T308</b>  | 9275     | Cell Signaling | <b>1</b>         | <b>1</b>         | <b>1</b>       | <b>1</b>         |
| <b>Ph Akt S473</b>  | 9271     | Cell Signaling | <b>1</b>         | <b>1</b>         | <b>0.663</b>   | <b>0.2457</b>    |
| <b>Gsk3 beta</b>    | 9315     | Cell Signaling | <b>4.66e-06</b>  | <b>0.0179</b>    | <b>1</b>       | <b>1</b>         |
| <b>c-Myc</b>        | sc-764   | Santa Cruz     | <b>1</b>         | <b>1</b>         | <b>0.003</b>   | <b>2.496e-06</b> |
| <b>JNK1</b>         | 610628   | BD Biosciences | <b>1</b>         | <b>1</b>         | <b>0.00022</b> | <b>1.356e-06</b> |
| <b>PCNA</b>         | sc-7907  | Santa Cruz     | <b>0.00024</b>   | <b>7.02e-05</b>  | <b>0.073</b>   | <b>0.00466</b>   |
| <b>Beta-catenin</b> | 9562     | Cell Signaling | <b>1.248e-11</b> | <b>8.97e-10</b>  | <b>1</b>       | <b>1</b>         |
| <b>Ph Raf</b>       | 9421     | Cell Signaling | <b>1</b>         | <b>1</b>         | <b>0.1633</b>  | <b>0.00546</b>   |
| <b>SRC</b>          | 2123     | Cell Signaling | <b>0.00175</b>   | <b>0.00358</b>   | <b>1</b>       | <b>1</b>         |
| <b>p 38 alpha</b>   | 9212     | Cell Signaling | <b>0.00207</b>   | <b>0.00382</b>   | <b>0.00055</b> | <b>1.94e-06</b>  |
| <b>CDK4</b>         | 2341-1   | Epitomics      | <b>1</b>         | <b>1</b>         | <b>0.00468</b> | <b>0.00012</b>   |
| <b>Akt1</b>         | 610860   | BD Biosciences | <b>1</b>         | <b>1</b>         | <b>0.00105</b> | <b>5.85e-07</b>  |
| <b>Akt2</b>         | 3063     | Cell Signaling | <b>0.3042</b>    | <b>1</b>         | <b>0.0858</b>  | <b>0.0507</b>    |
| <b>ERK1</b>         | AF1575   | R&D Systems    | <b>1</b>         | <b>0.3549</b>    | <b>1</b>       | <b>1</b>         |
| <b>ERK2</b>         | sc-81458 | Santa Cruz     | <b>1</b>         | <b>1</b>         | <b>1</b>       | <b>1</b>         |
| <b>ErbB1</b>        | 2646     | Cell Signaling | <b>1.443e-05</b> | <b>1.131e-07</b> | <b>0.00113</b> | <b>9.36e-06</b>  |
| <b>Bcl-2</b>        | ab32124  | abcam          | <b>1</b>         | <b>0.00125</b>   | <b>1</b>       | <b>1</b>         |
| <b>GRB2</b>         | 3972     | Cell Signaling | <b>1</b>         | <b>1</b>         | <b>0.0238</b>  | <b>0.00125</b>   |
| <b>Her-2</b>        | ab17     | NeoMarkers     | <b>0.624</b>     | <b>0.0468</b>    | <b>0.3588</b>  | <b>0.01365</b>   |

|                        |         |                |                 |                  |                  |                  |
|------------------------|---------|----------------|-----------------|------------------|------------------|------------------|
| <b>mTOR</b>            | 2983    | Cell Signaling | <b>8.97e-05</b> | <b>0.000585</b>  | <b>0.000858</b>  | <b>7.02e-06</b>  |
| <b>PARP</b>            | AM-30   | Calbiochem     | <b>1</b>        | <b>1</b>         | <b>1</b>         | <b>0.702</b>     |
| <b>p 27</b>            | 610241  | BD Biosciences | <b>0.1833</b>   | <b>0.3003</b>    | <b>1</b>         | <b>1</b>         |
| <b>P13K p110 alpha</b> | 4249    | Cell Signaling | <b>0.00585</b>  | <b>0.000324</b>  | <b>1</b>         | <b>0.663</b>     |
| <b>P13K p85 alpha</b>  | ab40755 | abcam          | <b>1</b>        | <b>1</b>         | <b>1</b>         | <b>1</b>         |
| <b>P13K p110 beta</b>  | ab32569 | abcam          | <b>1</b>        | <b>1</b>         | <b>0.0382</b>    | <b>0.624</b>     |
| <b>PLC gamma</b>       | ab41433 | abcam          | <b>1</b>        | <b>1</b>         | <b>0.1131</b>    | <b>9.75e-05</b>  |
| <b>PP2A_A</b>          | 2039    | Cell Signaling | <b>0.702</b>    | <b>0.78</b>      | <b>1</b>         | <b>1</b>         |
| <b>PP2A_B</b>          | 4953    | Cell Signaling | <b>1</b>        | <b>1</b>         | <b>1</b>         | <b>1</b>         |
| <b>PTEN</b>            | 9552    | Cell Signaling | <b>6.24e-10</b> | <b>3.354e-07</b> | <b>2.262e-06</b> | <b>1.092e-08</b> |
| <b>Rb</b>              | 9309    | Cell Signaling | <b>1</b>        | <b>0.2262</b>    | <b>1</b>         | <b>1</b>         |
| <b>Smad23</b>          | 3102    | Cell Signaling | <b>1</b>        | <b>1</b>         | <b>1</b>         | <b>1</b>         |
| <b>Stat3</b>           | 610189  | BD Biosciences | <b>0.0226</b>   | <b>0.663</b>     | <b>0.00199</b>   | <b>0.00012</b>   |
| <b>Stat5</b>           | sc-835  | Santa Cruz     | <b>5.46e-07</b> | <b>3.12e-05</b>  | <b>0.00078</b>   | <b>8.97e-06</b>  |
